# Supplementary material for: NGS analysis in Marfan syndrome spectrum: Combination of rare and common genetic variants to improve genotype-phenotype correlation analysis
Source: PLoS One. 2019 Sep 19;14(9):e0222506. doi: 10.1371/journal.pone.0222506 (PMC6752800; doi:10.1371/journal.pone.0222506)
Supplement: S3 Table — Common variant that failed to reach significant association levels, however they resulted nominally associated (unadjusted p value < 0.05) to several phenotypic signs in the Ghent 2010 positive cohort. (XLSX) [file pone.0222506.s006.xlsx]

## Sheet: Nominally_sign_G2010
S3 Table: Common variant that failed to reach significant association levels, however they resulted nominally associated (unadjusted p value < 0.05) to several phenotypic signs in the Ghent 2010 positive cohort
SIGN	VARIANT	RS	CHR	UNADJUSTED-P	ADJUSTED-P	OR	L95	U95
Aortic dissection	chr9-139407932-A-G	rs2229971	9	0.00999	0.6833	47.22	1.79	1245
Aortic dissection	chr3-30648360-A-G	NA	3	0.01898	0.9491	13.08	1088	157.3
Aortic dissection	chr9-137645713-A-G	NA	9	0.02897	0.98	11.6	0.9447	142.6
Aortic dissection	chr9-139412884-C-T	rs3125009	9	0.03097	0.957	7292	1044	50.95
Aortic dissection	chr9-137653736-C-A	rs10858278	9	0.03596	0.986	12.38	0.9231	166.1
Aortic dissection	chr9-137645708-A-G	NA	9	0.03596	0.987	11.43	0.9102	143.4
Aortic dissection	chr9-139397707-G-A	rs10521	9	0.03996	0.979	3772	0.9837	14.47
Aortic dissection	chr9-137678038-T-C	rs3124934	9	0.04296	0.999	7793	0.7782	78.03
Aortic dissection	chr9-137622039-G-A	rs3128598	9	0.04895	0.98	5743	0.9662	34.14
Aortic ectasia	chr2-189870246-A-C	rs7583195	2	0.000999	0.1169	0.08786	0.01822	0.4237
Aortic ectasia	chr16-15818310-G-A	rs11130	16	0.008991	0.6174	0.3011	0.1199	0.7558
Aortic ectasia	chr2-189875237-T-G	rs35162377	2	0.01099	0.6174	0.2039	0.06026	0.6903
Aortic ectasia	chr16-15850204-A-G	rs2272554	16	0.01199	0.5764	0.268	0.09855	0.7287
Aortic ectasia	chr16-15802946-G-T	rs9746950	16	0.01898	0.7832	0.3031	0.115	0.7989
Aortic ectasia	chr7-94056251-GA-G	rs543944044	7	0.01898	0.989	0.1545	0.02609	0.9144
Aortic ectasia	chr16-15818141-A-C	rs2075511	16	0.01998	0.8072	0.3434	0.1433	0.8226
Aortic ectasia	chr2-189875125-A-G	rs41265549	2	0.02198	0.997	0.1897	0.03617	0.9948
Aortic ectasia	chr16-15811023-C-T	rs1050163	16	0.02697	0.9061	0.3515	0.1428	0.8654
Aortic ectasia	chr9-137674627-A-G	NA	9	0.03497	0.994	5047	1036	24.59
Aortic ectasia	chr16-15811062-C-T	rs1050162	16	0.04595	0.994	0.4121	0.1739	0.9766
Arachnodactily	chr9-101911656-A-G	rs868	9	0.01598	0.8971	0.2702	0.08598	0.8494
Arachnodactily	chr16-15917321-T-C	rs2272552	16	0.01598	0.972	0.3116	0.1047	0.9279
Arachnodactily	chr15-48784915-T-C	rs34837775	15	0.02198	0.986	0.2568	0.0697	0.9458
Arachnodactily	chr9-101908915-G-A	rs334354	9	0.02498	0.98	0.3024	0.09775	0.9356
Arachnodactily	chr10-90750909-C-T	rs12775501	10	0.03696	0.987	0.3529	0.1288	0.9672
Arachnodactily	chr15-48763008-A-T	rs75227249	15	0.03996	1	0.321	0.08894	1159
Arachnodactily	chr2-189863389-C-T	rs13306272	2	0.04296	0.987	3371	1039	10.94
Arachnodactily	chr15-48813107-G-T	rs2413907	15	0.04496	1	0.3494	0.104	1173
Arachnodactily	chr17-48266804-T-A	NA	17	0.04795	0.997	7029	0.9668	51.1
Ectopia lentis	chr15-48765033-A-C	rs28730794	15	0.01399	0.8002	0.302	0.1139	0.8011
Ectopia lentis	chr16-15811023-C-T	rs1050163	16	0.01499	0.8741	2888	1175	7102
Ectopia lentis	chr15-48765044-T-G	rs28730795	15	0.01598	0.8761	0.3045	0.1109	0.8359
Ectopia lentis	chr15-48779200-AATAAC-A	rs72132658	15	0.02198	0.9351	0.3088	0.1091	0.8736
Ectopia lentis	chr3-30713126-T-A	rs11466512	3	0.02498	0.8152	4301	1.3	14.23
Ectopia lentis	chr15-48789634-T-C	rs140605	15	0.02498	0.97	0.3447	0.1296	0.9166
Ectopia lentis	chr16-15818310-G-A	rs11130	16	0.02597	0.9411	2687	1114	6483
Ectopia lentis	chr15-48779231-GTAAAA-G	rs72158035	15	0.02897	0.981	0.1002	0.01162	0.8635
Ectopia lentis	chr15-48779402-C-T	rs11853943	15	0.02897	0.981	0.1002	0.01162	0.8635
Ectopia lentis	chr15-48797307-A-G	rs25458	15	0.03596	0.987	0.2056	0.04536	0.9319
Ectopia lentis	chr15-48797424-C-A	rs8037304	15	0.03596	0.987	0.2056	0.04536	0.9319
Ectopia lentis	chr15-48784915-T-C	rs34837775	15	0.03896	0.994	0.1161	0.01376	0.9799
Ectopia lentis	chr7-94040345-GTTT-G	NA	7	0.04995	1	3.85	0.7399	20.03
Flatfoot	chr9-137653750-G-A	rs77716946	9	0.000999	0.3167	0.02476	0.001838	0.3335
Flatfoot	chr16-15818842-A-G	rs16967510	16	0.002997	0.4795	0.07739	0.01169	0.5122
Flatfoot	chr16-15841830-G-A	rs2293736	16	0.002997	0.5564	0.07711	0.01111	0.5353
Flatfoot	chr16-15842023-G-A	rs880071	16	0.002997	0.5564	0.07711	0.01111	0.5353
Flatfoot	chr9-137657811-C-G	rs4842156	9	0.003996	0.6593	0.08408	0.01203	0.5875
Flatfoot	chr16-15872829-A-G	rs62030562	16	0.004995	0.5554	0.08448	0.01305	0.547
Flatfoot	chr9-137709182-C-G	rs11103537	9	0.005994	0.6084	4263	1393	13.04
Flatfoot	chr2-189910066-ATG-A	rs111268949	2	0.01598	0.9471	11.01	1279	94.76
Flatfoot	chr9-137653736-C-A	rs10858278	9	0.01598	0.969	0.1613	0.03033	0.858
Flatfoot	chr9-137533634-C-G	rs12002679	9	0.01698	0.9301	3397	1159	9.95
Flatfoot	chr7-94039187-A-G	rs2521206	7	0.01898	0.9311	6424	1247	33.09
Flatfoot	chr16-15835815-G-C	rs2075510	16	0.02198	0.972	0.1457	0.02476	0.8573
Flatfoot	chr9-137708960-A-C	rs10776910	9	0.02298	0.9201	3631	1183	11.14
Flatfoot	chr9-137708973-A-G	rs10858283	9	0.02298	0.9201	3631	1183	11.14
Flatfoot	chr2-189875125-A-G	rs41265549	2	0.03097	0.998	0.1882	0.03424	1034
Flatfoot	chr17-48274309-T-C	rs2075554	17	0.03397	0.989	5381	1066	27.15
Flatfoot	chr9-139412197-G-A	rs9411208	9	0.03896	0.983	2832	1046	7666
Flatfoot	chr7-94049866-A-C	NA	7	0.04595	0.992	5886	1038	33.38
Flatfoot	chr7-94049867-A-T	NA	7	0.04595	0.992	5886	1038	33.38
Flatfoot	chr2-189852081-T-TA	rs569104099	2	0.04795	1	7407	0.8692	63.12
Flatfoot	chr9-137704620-C-G	rs7856170	9	0.04995	0.996	2702	1.01	7226
Hyperlaxity	chr17-48272055-C-T	rs2253369	17	0.01099	0.6643	4206	1372	12.89
Hyperlaxity	chr17-48266804-T-A	NA	17	0.01299	0.7353	7.95	1504	42.03
Hyperlaxity	chr9-137674627-A-G	NA	9	0.01598	0.8092	10.98	1516	79.51
Hyperlaxity	chr7-94040345-GTT-G	rs796364511	7	0.01698	0.954	11.94	1269	112.4
Hyperlaxity	chr2-189926228-TAA-T	NA	2	0.01898	0.9471	0.1875	0.04169	0.8429
Hyperlaxity	chr2-189864080-G-A	rs1800255	2	0.01998	0.8821	0.3366	0.1323	0.8562
Hyperlaxity	chr17-48269426-C-T	rs2586490	17	0.02498	0.8581	3218	1.2	8626
Hyperlaxity	chr17-48265426-A-G	rs2586488	17	0.02797	0.8651	3781	1223	11.69
Hyperlaxity	chr17-48266811-G-C	NA	17	0.03197	0.95	5868	1191	28.91
Hyperlaxity	chr9-137657811-C-G	rs4842156	9	0.03996	1	0.2569	0.04595	1436
Hyperlaxity	chr2-189855943-G-A	rs3736487	2	0.04895	0.994	0.3916	0.1561	0.9823
Mitral valve prolapse	chr9-101908915-G-A	rs334354	9	0.003996	0.6873	0.2007	0.05674	0.7101
Mitral valve prolapse	chr9-101911656-A-G	rs868	9	0.004995	0.6224	0.1969	0.05629	0.689
Mitral valve prolapse	chr9-137664871-G-C	rs7470855	9	0.005994	0.4106	0.1829	0.05341	0.626
Mitral valve prolapse	chr7-94041937-A-C	rs412777	7	0.00999	0.6863	0.2415	0.07895	0.7386
Mitral valve prolapse	chr9-137664915-C-CTGCCCATGACCGGATCGGG	rs6151208	9	0.01099	0.7213	0.2134	0.06223	0.7316
Mitral valve prolapse	chr9-137658722-G-A	rs4842158	9	0.01099	0.8881	0.2796	0.09378	0.8333
Mitral valve prolapse	chr2-189910066-ATG-A	rs111268949	2	0.01598	0.958	0.2113	0.05156	0.8662
Mitral valve prolapse	chr7-94051507-GAA-G.GA	rs376773026	7	0.01798	0.8781	0.1594	0.03345	0.7591
Mitral valve prolapse	chr7-94056251-GAAA-GA.G	NA	7	0.01998	0.9421	0.1772	0.03781	0.8307
Mitral valve prolapse	chr17-48265542-G-T	rs41316705	17	0.01998	0.988	9682	1057	88.73
Mitral valve prolapse	chr9-139412197-G-A	rs9411208	9	0.02697	0.8901	0.2756	0.09129	0.8323
Mitral valve prolapse	chr9-137645585-G-A	rs73558066	9	0.02997	0.968	0.2998	0.0984	0.9133
Mitral valve prolapse	chr9-137645662-C-T	rs73558067	9	0.02997	0.968	0.2998	0.0984	0.9133
Mitral valve prolapse	chr9-137646046-A-G	rs11103501	9	0.02997	0.968	0.2998	0.0984	0.9133
Mitral valve prolapse	chr9-137642577-T-C	rs12686426	9	0.03497	0.976	0.2827	0.08577	0.932
Mitral valve prolapse	chr7-94039410-C-G	rs2621208	7	0.03596	0.989	5093	1028	25.23
Mitral valve prolapse	chr9-137658608-A-G	rs4842157	9	0.04396	0.988	0.321	0.1061	0.9708
Mitral valve prolapse	chr9-137660194-G-T	rs4842162	9	0.04496	0.988	0.3209	0.1059	0.972
Mitral valve prolapse	chr9-137660375-A-G	rs10776900	9	0.04496	0.988	0.3209	0.1059	0.972
Mitral valve prolapse	chr9-137660455-T-C	rs10776901	9	0.04496	0.988	0.3209	0.1059	0.972
Mitral valve prolapse	chr7-94039900-C-T	rs42520	7	0.04496	0.989	3543	1018	12.33
Mitral valve prolapse	chr9-139412073-T-C	rs4077029	9	0.04695	0.987	0.3627	0.1355	0.9708
Myopia	chr3-30713126-T-A	rs11466512	3	0.005994	0.4146	0.1648	0.04516	0.6017
Myopia	chr9-137645585-G-A	rs73558066	9	0.01399	0.8002	0.2749	0.096	0.7873
Myopia	chr9-137645662-C-T	rs73558067	9	0.01399	0.8002	0.2749	0.096	0.7873
Myopia	chr9-137646046-A-G	rs11103501	9	0.01399	0.8002	0.2749	0.096	0.7873
Myopia	chr3-30686414-A-G	rs1155705	3	0.01998	0.9451	0.3249	0.1212	0.8714
Myopia	chr9-137645649-C-T	rs79679217	9	0.02398	0.9211	0.2687	0.0866	0.8337
Myopia	chr9-137646217-G-A	rs11103502	9	0.02398	0.9211	0.2687	0.0866	0.8337
Myopia	chr7-94056044-G-T	rs2621215	7	0.02597	0.951	0.3467	0.136	0.8843
Myopia	chr9-137733937-T-G	rs12554062	9	0.03397	0.984	0.2061	0.04744	0.8953
Myopia	chr7-94057418-A-C	rs10046552	7	0.03796	0.985	3.63	1092	12.06
Myopia	chr16-15892642-T-C	NA	16	0.03896	0.973	4124	1138	14.95
Myopia	chr9-139399641-G-A	rs13300218	9	0.04895	0.992	0.2362	0.05942	0.9391
Myopia	chr9-137664820-G-A	rs34911100	9	0.04995	1	0.1226	0.01316	1142
Myopia	chr9-137677017-G-A	rs71506921	9	0.04995	1	0.1226	0.01316	1142
Pectus carinatum	chr9-137623601-C-G	rs3124310	9	0.01399	0.8541	3639	1247	10.62
Pectus carinatum	chr9-137653736-C-A	rs10858278	9	0.02897	0.984	5302	1097	25.64
Pectus carinatum	chr2-189849773-A-G	rs3106796	2	0.03696	0.978	2848	1074	7552
Pectus carinatum	chr2-189856671-C-T	rs3134656	2	0.03696	0.978	2848	1074	7552
Pectus carinatum	chr2-189860128-C-T	rs3106798	2	0.03696	0.978	2848	1074	7552
Pectus carinatum	chr9-137657811-C-G	rs4842156	9	0.03696	0.997	6175	1034	36.9
Pectus carinatum	chr9-137642489-G-C	rs41299046	9	0.03796	1	0.1411	0.01754	1136
Pectus carinatum	chr17-48269302-G-A	rs2857396	17	0.04296	0.996	2542	1021	6327
Pectus carinatum	chr17-48266804-T-A	NA	17	0.04795	0.999	0.2288	0.05272	0.9933
Pectus carinatum	chr17-48265728-C-A	rs28574643	17	0.04995	0.997	2828	1013	7892
Pectus carinatum	chr17-48263021-C-T	rs2249492	17	0.04995	0.999	2444	0.9961	5997
Reduced elbow extension	chr16-15818141-A-C	rs2075511	16	0.002997	0.5974	9854	1547	62.78
Reduced elbow extension	chr16-15818310-G-A	rs11130	16	0.002997	0.6054	10.05	1545	65.32
Reduced elbow extension	chr15-48789634-T-C	rs140605	15	0.004995	0.6753	5191	1325	20.34
Reduced elbow extension	chr15-48797307-A-G	rs25458	15	0.005994	0.6583	8222	1447	46.74
Reduced elbow extension	chr15-48797424-C-A	rs8037304	15	0.005994	0.6583	8222	1447	46.74
Reduced elbow extension	chr9-137659402-T-TATTC	NA	9	0.006993	0.3746	33.56	2255	499.5
Reduced elbow extension	chr17-48265542-G-T	rs41316705	17	0.008991	0.5974	15.42	1684	141.2
Reduced elbow extension	chr15-48813107-G-T	rs2413907	15	0.00999	0.7542	9.87	1415	68.83
Reduced elbow extension	chr15-48779231-GTAAAA-G	rs72158035	15	0.01199	0.7952	7153	1317	38.85
Reduced elbow extension	chr15-48779402-C-T	rs11853943	15	0.01199	0.7952	7153	1317	38.85
Reduced elbow extension	chr17-48266815-G-T	rs752929501	17	0.01499	0.8941	21.51	1.37	337.8
Reduced elbow extension	chr17-48266811-G-C	NA	17	0.01598	0.9121	21.49	1.33	347
Reduced elbow extension	chr16-15811062-C-T	rs1050162	16	0.01598	0.9191	6597	1182	36.81
Reduced elbow extension	chr16-15811023-C-T	rs1050163	16	0.01698	0.9211	6612	1.18	37.04
Reduced elbow extension	chr15-48703823-A-G	rs8023401	15	0.01998	0.976	5161	1027	25.94
Reduced elbow extension	chr15-48713996-G-T	rs1820488	15	0.01998	0.976	5161	1027	25.94
Reduced elbow extension	chr15-48729648-T-C	rs2042746	15	0.01998	0.976	5161	1027	25.94
Reduced elbow extension	chr15-48779200-AATAAC-A	rs72132658	15	0.02098	0.972	3742	1031	13.58
Reduced elbow extension	chr17-48265728-C-A	rs28574643	17	0.02198	0.965	5742	1.07	30.8
Reduced elbow extension	chr7-94038934-C-T	rs42518	7	0.02198	0.976	5923	1032	33.98
Reduced elbow extension	chr7-94051507-GAA-G.GA	rs376773026	7	0.02298	0.968	0.02413	0.0006549	0.8889
Reduced elbow extension	chr16-15802946-G-T	rs9746950	16	0.02498	0.964	6041	1074	33.98
Reduced elbow extension	chr9-137674627-A-G	NA	9	0.02498	0.97	10.63	1075	105.1
Reduced elbow extension	chr15-48765033-A-C	rs28730794	15	0.02597	0.979	4218	1008	17.65
Reduced elbow extension	chr17-48266804-T-A	NA	17	0.02697	0.9441	20.63	1241	343
Reduced elbow extension	chr17-48265426-A-G	rs2586488	17	0.02997	0.979	8294	1.01	68.08
Reduced elbow extension	chr7-94039900-C-T	rs42520	7	0.03097	0.989	5699	0.9563	33.96
Reduced elbow extension	chr9-137630568-C-T	rs3109677	9	0.03397	0.966	5796	1064	31.57
Reduced elbow extension	chr9-137630587-T-C	rs3128612	9	0.03397	0.966	5796	1064	31.57
Reduced elbow extension	chr7-94039032-C-T	rs42519	7	0.03397	0.988	5722	0.9632	33.99
Reduced elbow extension	chr7-94043239-C-G	rs42524	7	0.03397	0.988	5722	0.9632	33.99
Reduced elbow extension	chr7-94040133-T-A	rs389328	7	0.03397	0.999	4537	0.8156	25.24
Reduced elbow extension	chr2-189870246-A-C	rs7583195	2	0.03497	0.999	5595	0.8132	38.49
Reduced elbow extension	chr17-48269302-G-A	rs2857396	17	0.03796	0.989	5682	0.9566	33.75
Reduced elbow extension	chr3-30686414-A-G	rs1155705	3	0.04196	0.998	0.105	0.008993	1225
Reduced elbow extension	chr9-139403268-T-C	rs3125000	9	0.04695	0.991	4895	0.943	25.41
Reduced elbow extension	chr15-48763008-A-T	rs75227249	15	0.04695	0.998	3.69	0.8748	15.57
Reduced elbow extension	chr15-48784915-T-C	rs34837775	15	0.04695	0.999	3908	0.8372	18.25
Scoliosis	chr15-48755472-G-A	rs77105137	15	0.002997	0.3387	0.1575	0.04305	0.5762
Scoliosis	chr15-48780504-TTAAAGA-T	rs143836403	15	0.002997	0.3387	0.1575	0.04305	0.5762
Scoliosis	chr15-48787245-T-C	rs6493325	15	0.002997	0.3387	0.1575	0.04305	0.5762
Scoliosis	chr9-137664820-G-A	rs34911100	9	0.004995	0.3516	0.07393	0.0118	0.4631
Scoliosis	chr9-137677017-G-A	rs71506921	9	0.004995	0.3516	0.07393	0.0118	0.4631
Scoliosis	chr17-48263021-C-T	rs2249492	17	0.004995	0.6663	0.2682	0.09626	0.747
Scoliosis	chr15-48903126-A-G	rs1018148	15	0.004995	0.7293	0.2527	0.08479	0.7533
Scoliosis	chr9-137686987-A-T	rs79481146	9	0.005994	0.5974	0.09736	0.01651	0.5742
Scoliosis	chr15-48806027-T-C	rs8034829	15	0.005994	0.6154	0.2139	0.06549	0.6988
Scoliosis	chr9-137677921-C-T	rs13301426	9	0.007992	0.6224	0.1253	0.02537	0.6186
Scoliosis	chr9-137681100-C-T	rs34636935	9	0.008991	0.8292	0.1099	0.01761	0.6858
Scoliosis	chr17-48269426-C-T	rs2586490	17	0.01399	0.7642	0.2987	0.1129	0.7903
Scoliosis	chr17-48263903-A-G	rs2277632	17	0.01499	0.9111	0.2407	0.069	0.8396
Scoliosis	chr17-48268443-G-T	rs2075557	17	0.01998	0.986	0.2608	0.07283	0.9336
Scoliosis	chr17-48269903-A-G	rs2696247	17	0.01998	0.986	0.2608	0.07283	0.9336
Scoliosis	chr10-90750909-C-T	rs12775501	10	0.02398	0.9081	0.3623	0.1492	0.88
Scoliosis	chr17-48274309-T-C	rs2075554	17	0.03197	0.969	0.2875	0.09083	0.9102
Scoliosis	chr9-139413908-C-T	rs2229975	9	0.04096	0.994	4104	1.02	16.51
Scoliosis	chr7-94059899-C-T	rs1060399	7	0.04595	0.992	0.3717	0.1412	0.9785
Scoliosis	chr7-94054194-C-T	rs41317734	7	0.04995	1	7305	0.7308	73.02
Scoliosis	chr7-94055885-G-A	rs62464631	7	0.04995	1	7305	0.7308	73.02
Scoliosis	chr7-94056099-A-G	rs7804898	7	0.04995	1	7305	0.7308	73.02
Scoliosis	chr7-94056216-G-A	rs7805430	7	0.04995	1	7305	0.7308	73.02
Scoliosis	chr7-94056349-C-T	rs1800248	7	0.04995	1	7305	0.7308	73.02
Stretch marks	chr16-15917197-G-A	rs1050111	16	0.000999	0.6254	0.1731	0.04439	0.6749
Stretch marks	chr9-137582999-A-G	rs12551860	9	0.001998	0.2747	0.1231	0.02897	0.5227
Stretch marks	chr16-15917321-T-C	rs2272552	16	0.002997	0.2707	0.1722	0.05122	0.5791
Stretch marks	chr9-137690422-G-T	NA	9	0.03297	0.989	0.4003	0.1658	0.9662
Stretch marks	chr9-137690425-T-A	NA	9	0.03297	0.989	0.4003	0.1658	0.9662
Stretch marks	chr16-15850204-A-G	rs2272554	16	0.04096	0.975	3071	1093	8627
Stretch marks	chr9-137690318-A-T	rs4240707	9	0.04795	0.999	0.4007	0.1585	1013
Stretch marks	chr9-137690414-G-GA	rs373039975	9	0.04795	0.999	0.4007	0.1585	1013
Thumb sign	chr9-137676802-T-G	rs117948766	9	0.006993	0.6094	0.1304	0.02724	0.6247
Thumb sign	chr9-137678020-T-C	rs12005720	9	0.006993	0.6094	0.1304	0.02724	0.6247
Thumb sign	chr9-137674488-G-A	rs41310213	9	0.006993	0.7113	0.1353	0.02763	0.6627
Thumb sign	chr9-137674762-T-C	rs35361637	9	0.006993	0.7113	0.1353	0.02763	0.6627
Thumb sign	chr9-137677090-T-G	rs12005196	9	0.006993	0.7113	0.1353	0.02763	0.6627
Thumb sign	chr16-15843965-G-A	rs79295535	16	0.006993	0.8172	13.46	1.54	117.7
Thumb sign	chr9-137694032-C-A	rs10858281	9	0.01798	0.7303	6003	1429	25.21
Thumb sign	chr16-15872609-A-G	rs2075514	16	0.02398	0.956	5901	1165	29.9
Thumb sign	chr16-15872748-G-T	rs11644832	16	0.02398	0.956	5901	1165	29.9
Thumb sign	chr16-15872807-G-A	rs11645883	16	0.02398	0.956	5901	1165	29.9
Thumb sign	chr16-15876471-T-C	rs2075513	16	0.02398	0.956	5901	1165	29.9
Thumb sign	chr9-137623534-C-T	rs56385965	9	0.02797	0.974	0.3529	0.1318	0.945
Thumb sign	chr16-15878252-C-T	rs8045778	16	0.02897	0.972	5.72	1122	29.16
Thumb sign	chr2-189861029-T-TACACACAC	rs374476004	2	0.03297	0.977	0.2927	0.09083	0.9431
Thumb sign	chr3-30686414-A-G	rs1155705	3	0.03497	0.961	0.3164	0.1097	0.9127
Thumb sign	chr9-137664820-G-A	rs34911100	9	0.03696	0.991	0.1722	0.03041	0.9752
Thumb sign	chr9-137677017-G-A	rs71506921	9	0.03696	0.991	0.1722	0.03041	0.9752
Thumb sign	chr9-137677921-C-T	rs13301426	9	0.03896	0.996	0.2056	0.03887	1088
Thumb sign	chr9-137686906-C-T	rs4072883	9	0.04296	0.988	3637	1.04	12.72
Thumb sign	chr9-137687038-A-G	rs4072882	9	0.04296	0.988	3637	1.04	12.72
Wrist sign	chr9-137582999-A-G	rs12551860	9	0.001998	0.1788	0.1221	0.02957	0.5043
Wrist sign	chr17-48270098-G-A	rs1800695	17	0.01199	0.9151	13.16	1374	125.9
Wrist sign	chr9-137592060-C-T	rs11103469	9	0.02498	0.994	0.1471	0.02251	0.9616
Wrist sign	chr7-94040345-GTT-G	rs796364511	7	0.02997	0.986	0.2003	0.04312	0.9301
Wrist sign	chr9-137688427-T-G	rs3811162	9	0.03097	0.979	3883	1084	13.91
Wrist sign	chr9-137686906-C-T	rs4072883	9	0.03596	0.994	3683	1027	13.21
Wrist sign	chr9-137687038-A-G	rs4072882	9	0.03596	0.994	3683	1027	13.21
Wrist sign	chr16-15865472-G-A	rs4781689	16	0.04196	0.996	0.2743	0.07159	1051
Wrist sign	chr9-101911656-A-G	rs868	9	0.04296	0.999	0.3463	0.1109	1081
Wrist sign	chr9-137533634-C-G	rs12002679	9	0.04496	0.995	0.3532	0.1265	0.9865
Wrist sign	chr2-189953660-TTTGA-T	rs75422763	2	0.04795	1	0.1989	0.03122	1267
Wrist sign	chr2-189910066-ATG-A	rs111268949	2	0.04895	1	0.2903	0.07595	1.11
